# Supplementary material for: Human RPA activates BLM’s bidirectional DNA unwinding from a nick
Source: eLife. 2020 Feb 26;9:e54098. doi: 10.7554/eLife.54098 (PMC7065910; doi:10.7554/eLife.54098)
Supplement: Figure 1—source data 1. [file elife-54098-fig1-data1.xlsx]

## Sheet: Figure 1
Figure 1 E
200 nM BLM unwinding rate(bp/s)
64
68
68
68
68
55
57
68
67
67
67
67
54
63
45
57
57
43
63
64
79
60
61
54
40
45
