# Supplementary material for: Human RPA activates BLM’s bidirectional DNA unwinding from a nick
Source: eLife. 2020 Feb 26;9:e54098. doi: 10.7554/eLife.54098 (PMC7065910; doi:10.7554/eLife.54098)
Supplement: Figure 3—source data 1. [file elife-54098-fig3-data1.xlsx]

## Sheet: Figure 3
Figure 3A Distributions of the required forces to monitor DNA unwinding
BLM 200 nM/RPA concentration	Percentage (%) (n = 66)
	5 pN	10 pN	20 pN	30 pN	No Unwinding
0 nM	0	12	38	32	18
50 nM	31	37	21	11	0
100 nM	43	42	15	0	0
200 nM	75	25	0	0	0
Figure 3C Distributions of the required forces to monitor DNA unwinding
BLM 20 nM/RPA concentration	Percentage (%) (n = 101)
	5 pN	10 pN	20 pN	30 pN	No Unwinding
0 nM	0	0	0	0	100
50 nM	0	9.7	41.9	31.4	17
100 nM	33.3	13.3	13.4	30	10
200 nM	50	21.8	12.5	12.6	4
