# Supplementary material for: Human RPA activates BLM’s bidirectional DNA unwinding from a nick
Source: eLife. 2020 Feb 26;9:e54098. doi: 10.7554/eLife.54098 (PMC7065910; doi:10.7554/eLife.54098)
Supplement: Figure 4—source data 1. [file elife-54098-fig4-data1.xlsx]

## Sheet: Figure 4
Figure 4 C
200 nM BLM + 50 nM RPA unidirectional unwinding rate (bp/s)	200 nM BLM +50 nM RPA bidirectional unwinding rate (bp/s)
115	115
84	105
79	119
105	90
64	120
66	118
61	93
90	94
85	83
61	91
18	121
118	108
93	101
42	74
94	137
82	170
91	141
51	135
83	162
50	150
19	127
91
116
56
69
45
25
