# Supplementary material for: Human RPA activates BLM’s bidirectional DNA unwinding from a nick
Source: eLife. 2020 Feb 26;9:e54098. doi: 10.7554/eLife.54098 (PMC7065910; doi:10.7554/eLife.54098)
Supplement: Figure 5—source data 1. [file elife-54098-fig5-data1.xlsx]

## Sheet: Figure 5
Figure 5 D
20 nM core-BLM + 50 nM RPA unidirection unwinding rate (bp/s)	20 nM core-BLM +50 nM RPA directional unwinding rate (bp/s)
105	136
97	103
33	136
87	151
60	101
105	128
120	85
103	167
72	72
85	151
76	169
22	120
129	102
34	172.6
64	184
75	76
27	138
54	107
85	105
51
124
81
69
40
41
43
